# Supplementary material for: In vitro and ex vivo anti-tumor effect and mechanism of Tucatinib in leukemia stem cells and ABCG2-overexpressing leukemia cells
Source: PubMed Central journal article supplement — Oncol Rep. 2020 Dec 30;45(3):1142–52. doi: 10.3892/or.2020.7915 (PMC7859976; doi:10.3892/or.2020.7915), 2020-12-30
Supplement: Supplementary_Data.pdf [file Supplementary_Data.pdf]

Table SI. Patient information.

| Patient number | Sex    | Age | Type of leukemia              |
|----------------|--------|-----|-------------------------------|
| 1              | Male   | 63  | Diffuse large B cell lymphoma |
| 2              | Female | 45  | Acute lymphocytic leukemia    |
| 3              | Female | 29  | Acute myeloid leukemia        |
| 4              | Male   | 14  | Acute lymphocytic leukemia    |
| 5              | Female | 30  | Acute lymphocytic leukemia    |
| 6              | Female | 49  | Acute lymphocytic leukemia    |
